# Supplementary material for: Structural and Functional Characterization of a Complex between the Acidic Transactivation Domain of EBNA2 and the Tfb1/p62 Subunit of TFIIH
Source: PLOS journal article supplement (doi:10.1371/journal.ppat.1004042), 2014-03-27
Supplement: S3 (10.1371/journal.ppat.1004042.s003) [file journal.ppat.1004042.s003]

**A**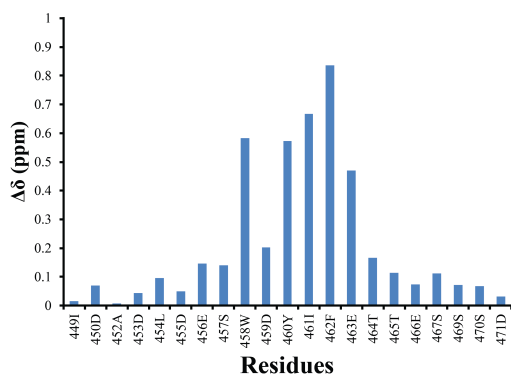**B**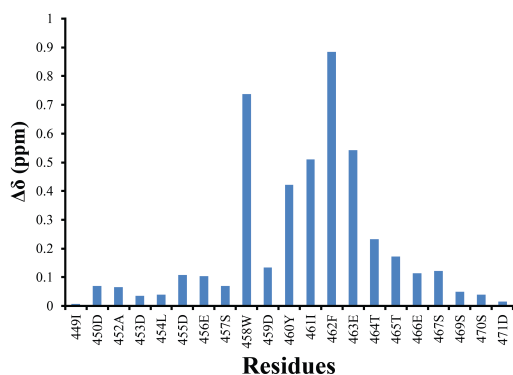

**Supplementary Figure S3. NMR mapping studies of EBNA2<sub>448-471</sub> with Tfb1PH and CBP KIX.** Histogram showing the variation in chemical shifts observed in the  $^1\text{H}$ - $^{15}\text{N}$  HSQC spectra of  $^{15}\text{N}$ -labeled EBNA2<sub>448-471</sub> following the addition of either (A) Tfb1PH or (B) CBP KIX. Changes in chemical shifts are represented by  $\Delta\delta = [(0.17\Delta\text{N}_\text{H})^2 + (\Delta\text{H}_\text{N})^2]^{1/2}$ , where  $\Delta\text{N}_\text{H}$  and  $\Delta\text{H}_\text{N}$  is the chemical shift difference between the two signals in ppm.
